# Supplementary material for: Down-regulation of MRPS23 inhibits LPS-induced proliferation and invasionviaregulation of the NF-κB signaling pathway in osteosarcoma cells
Source: Royal Society of Chemistry journal article supplement (doi:10.1039/c8ra08973f), 2019-01-01
Supplement: c8ra08973f1.pdf [file c8ra08973f1.pdf]

Supplemental Figure

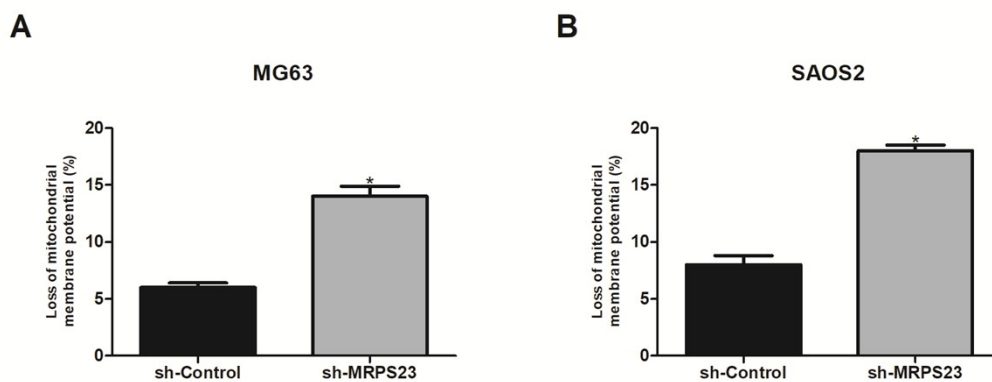

**Fig. S1, related to Fig. 2.** Down-regulation of MRPS23 induces loss of mitochondrial membrane potential in OS cells. (A, B) Mitochondrial membrane potential in MG63 and SAOS2 cells was quantified by measuring JC-1 fluorescence intensity. \* $p < 0.05$
